# Supplementary material
Source: Springer Nature journal article supplement (https://www.springermedizin.de/resource/supplementary/12968_2013_3357_MOESM10_ESM.pdf/9583488)

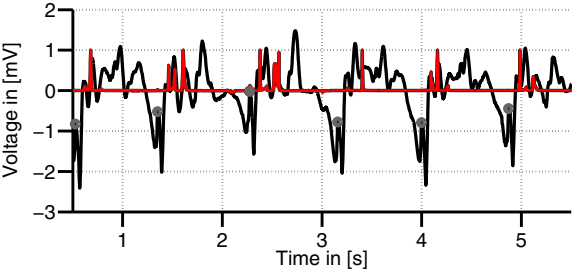

(a) VCG-based gating method

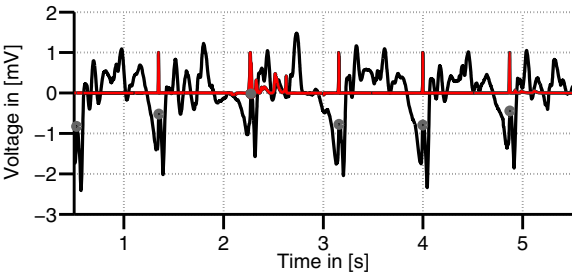

(b) VCG-based gating method, modified

Supplement: MOESM10 [file 9583488]
